# Supplementary material
Source: Elsevier journal article supplement (https://www.sciencedirect.com/science/article/pii/S2173573521000880)
Supplement: mmc1 [file S2173573521000880:mmc1.docx]

**MATERIAL SUPLEMENTARIO**

**Tabla 1.** Características de los tumores índice (n=5.223) de los pacientes incluidos en el estudio.

| **Edad** (media / desviación estándar) años | | 61,9 (11,7) |
| --- | --- | --- |
| **Género** | Masculino | 4.647 (89,0%) |
| Femenino | 576 (11,0%) |
| **Localización** | Cavidad oral | 693 (13,3%) |
| Rinofaringe | 252 (4,8%) |
| Orofaringe | 990 (19,0%) |
| Hipofaringe | 465 (8,9%) |
| Laringe | 2.687 (54,1%) |
| Metástasis cervical | 136 (2,6%) |
| **Tóxicos** | No | 476 (9,1%) |
| Moderado | 775 (14,8%) |
| Severo | 3.972 (76,0%) |
| **cT** | cT1-2 | 2.973 (56,9%) |
| cT3-4 | 2.250 (43,1%) |
| **cN** | cN0 | 3.113 (59,6%) |
| cN+ | 2.110 (40,4%) |
| **Grado histológico** | Bien diferenciado | 743 (14,2%) |
| Mod. diferenciado | 3.731 (71,4%) |
| Mal diferenciado | 749 (14,3%) |

**Tabla 2.** Características de los tumores incluidos en el análisis de supervivencia en función del género.

| **Edad** (media / desviación estándar) años | | 62,0 (11,5) |
| --- | --- | --- |
| **Género** | Masculino | 4.751 (89,4%) |
| Femenino | 562 (10,6%) |
| **Localización** | Cavidad oral | 749 (14,1%) |
| Rinofaringe | 232 (4,4%) |
| Orofaringe | 1.099 (20,7%) |
| Hipofaringe | 504 (9,5%) |
| Laringe | 2.604 (49,0%) |
| Metástasis cervical | 125 (2,4%) |
| **Tóxicos** | No | 469 (8,8%) |
| Moderado | 770 (14,5%) |
| Severo | 4.074 (76,7%) |
| **cT** | cT1-2 | 3.066 (57,7%) |
| cT3-4 | 2.247 (42,3%) |
| **cN** | cN0 | 3.305 (62,2%) |
| cN+ | 2.008 (42,3%) |
| **Grado histológico** | Bien diferenciado | 747 (14,1%) |
| Mod. diferenciado | 3.821 (71,9%) |
| Mal diferenciado | 745 (14,0%) |

**Tabla 3.** Valores del porcentaje de cambio anual (Annual Percentage rate Change, APC) en la proporción de tumores en pacientes de género femenino a lo largo del periodo de estudio.

|  | **APC** | **IC 95%** | **P** |
| --- | --- | --- | --- |
| Global de pacientes | 4,20 | 3,5 a 4,9 | 0,04 |
| 1981-2001 | 2,13 | 0,1 a 4,2 | 0,03 |
| 2001-2019 | 5,97 | 4,2 a 7,7 | 0,0001 |
| Cavidad oral | 4,20 | 3,5 a 4,9 | 0,0001 |
| Rinofaringe | 1,95 | -4,5 a 8,8 | 0,54 |
| Orofaringe | 5,62 | 2,7 a 8,6 | 0,0001 |
| Hipofaringe | 5,58 | -1,5 a 13,2 | 0,12 |
| Laringe | 6,78 | 3,3 a 10,3 | 0,0001 |
| Metástasis sin primario | 4,48 | -4,9 a 14,8 | 0,34 |

**Tabla 4.** Distribución por trienios de los pacientes en función de la localización primaria del tumor (% género masculino / % género femenino).

|  | **Global** | **Cavidad oral** | **Rinofaringe** | **Orofaringe** | **Hipofaringe** | **Laringe** | **1º desconocido** |
| --- | --- | --- | --- | --- | --- | --- | --- |
| 1985-1987 | 530 (94,3%/5,7%) | 50  (86,0%/14,0%) | 30  (70,0%/30,0%) | 99  (92,9%/7,1%) | 38  (97,4%/2,6%) | 304  (98,4%/1,6%) | 9  (88,9%/11,1%) |
| 1988-1990 | 577  (92,7%/7,3%) | 74  (71,6%/28,4%) | 25  (80,0%/20,0%) | 88  (94,36%/5,7%) | 53  (98,1%/1,9%) | 333  (97,0%/3,0%) | 4  (100%/0%) |
| 1991-1993 | 601  (92,5%/7,5%) | 90  (77,8%/22,2%) | 29  (75,9%/24,1%) | 138  (96,4%/3,6%) | 59  (98,3%/1,7%) | 276  (96,0%/4,0%) | 9  (88,9%/11,1%) |
| 1994-1996 | 629  (91,7%/8,1%) | 88  (75,0%/25,0%) | 21  (81,0%/19,0%) | 129  (90,7%/9,3%) | 62  (95,2%/4,8%) | 317  (96,8%/3,2%) | 12  (91,7%/8,3%) |
| 1997-1999 | 565  (91,9%/8,1%) | 82  (76,8%/23,2%) | 26  (88,5%/11,5%) | 105  (89,5%/10,5%) | 59  (93,2%/6,8%) | 273  (97,4%/2,6%) | 20  (90,0%/10,0%) |
| 2000-2002 | 549  (92,2%/7,8%) | 74  (82,4%/17,6%) | 18  (66,7%/33,3%) | 115  (89,6%/10,4%) | 63  (96,8%/3,2%) | 265  (96,6%/3,4%) | 14  (92,9%/7,1%) |
| 2003-2005 | 509  (86,8%/13,2%) | 70  (65,7%/34,3%) | 26  (73,1%/26,9%) | 97  (91,8%/8,2%) | 55  (85,5%/14,5%) | 244  (92,2%/7,8%) | 17  (94,1%/5,9%) |
| 2006-2008 | 485  (87,8%/12,2%) | 72  (72,2%/27,8%) | 16  (43,8%/56,3%) | 113  (90,3%/9,7%) | 52  (92,3%/7,7%) | 220  (93,2%/6,8%) | 12  (100%/0%) |
| 2009-2011 | 398  (84,2%/15,8%) | 47  (59,6%/40,4%) | 14  (71,4%/28,6%) | 88  (81,8%/18,2%) | 40  (92,5%/7,5%) | 196  (91,3%/8,7%) | 13  (69,2%/30,8%) |
| 2012-2014 | 380  (84,7%/15,3%) | 68  (70,6%/29,4%) | 13  (61,5%/38,5%) | 97  (82,5%/17,5%) | 30  (90,0%/10,0%) | 158  (93,0%/7,0%) | 14  (85,7%/14,3%) |
| 2015-2017 | 282  (78,1%/21,9%) | 75  (53,3%/46,7%) | 24  (54,2%/45,8%) | 76  (82,9%/17,1%) | 22  (95,5%/4,5%) | 155  (88,4%/11,6%) | 9  (88,9%-11,1%) |
| 2018-2019 | 244  (75,0%/25,0%) | 58  (48,3%/51,7%) | 15  (80,0%/20,0%) | 47  (76,6%/23,4%) | 26  (88,5%/11,5%) | 92  (87,0%/13,0%) | 6  (66,7%/33,3%) |
| Total | 5828 (88,9%/11,1%) | 848  (70,5%/29,5%) | 257  (71,6%/28,4%) | 1192  (89,3%/10,7%) | 559  (93,9%/6,1%) | 2833  (94,9%/5,1%) | 139  (88,5%/11,5%) |

**Tabla 5.** Distribución por trienios de los pacientes en función de la localización primaria del tumor considerando tan sólo los tumores índice (% género masculino / % género femenino).

|  | **Global** | **Cavidad oral** | **Rinofaringe** | **Orofaringe** | **Hipofaringe** | **Laringe** | **1º desconocido** |
| --- | --- | --- | --- | --- | --- | --- | --- |
| 1985-1987 | 517  (94,2%/5,8%) | 47  (85,1%/14,9%) | 30  (70,0%/30,0%) | 95  (92,6%/7,4%) | 36  (97,2%/2,8%) | 300  (98,3%/1,7%) | 9  (88,9%/11,1%) |
| 1988-1990 | 556  (92,6%/7,4%) | 69  (71,0%/29,0%) | 25  (80,0%/20,0%) | 81  (93,8%/6,2%) | 51  (98,0%/2,0%) | 326  (96,9%/3,1%) | 4  (100%/0%) |
| 1991-1993 | 566  (92,9%/7,1%) | 80  (78,8%/21,3%) | 29  (75,9%/24,1%) | 124  (96,8%/3,2%) | 53  (100%/0%) | 271  (95,9%/4,1%) | 9  (88,9%/11,1%) |
| 1994-1996 | 571  (91,4%/8,6%) | 76  (73,7%/26,3%) | 21  (81,0%/19,0%) | 110  (90,0%/10,0%) | 53  94,3%/5,7%) | 299  (96,7%/3,3%) | 12  (91,7%/8,3%) |
| 1997-1999 | 507  (91,5%/8,5%) | 65  (72,3%/27,7%) | 25  (88,0%/12,0%) | 87  (87,4%/12,6%) | 51  (94,1%/5,9%) | 259  (97,7%/2,3%) | 20  (90,0%/10,0%) |
| 2000-2002 | 471  (92,4%/7,6%) | 56  (82,1%/17,9%) | 18  (66,7%/33,3%) | 86  (89,5%/10,5%) | 48  (97,9%/2,1%) | 249  (96,4%/3,6%) | 14  (92,9%/7,1%) |
| 2003-2005 | 450  (86,0%/14,0%) | 58  (62,1%/37,9%) | 26  (73,1%/26,9%) | 77  (90,9%/9,1%) | 44  (81,8%/18,2%) | 230  (92,2%/7,8%) | 15  (93,3%/6,7%) |
| 2006-2008 | 415  (86,5%/13,5%) | 58  (62,1%/37,9%) | 16  (43,8%/56,3%) | 90  (87,8/12,2%) | 37  (89,2%/10,8%) | 202  (93,1%/6,9%) | 12  (100%/0%) |
| 2009-2011 | 338  (83,7%/16,3%) | 36  (58,3%/41,7%) | 13  (69,2%/30,8%) | 66  (78,8%/21,2%) | 31  (93,5%/6,5%) | 180  (91,1%/8,9%) | 12  (66,7%/33,3%) |
| 2012-2014 | 312  (85,3%/14,7%) | 47  (70,2%/29,8%) | 11  (72,7%/27,3%) | 73  (82,2%/17,8%) | 26  (88,5%/11,5%) | 141  (92,2%/7,88%) | 14  (85,7%/41,3%) |
| 2015-2017 | 321  (77,9%/22,1%) | 62  (50,0%/50,0%) | 24  (54,2%/45,8%) | 66  (83,3%/16,7%) | 16  (93,8%/6,3%) | 144  (88,9%/11,1%) | 9  (88,9%/11,1%) |
| 2018-2019 | 199  (76,9%/23,1%) | 39  (48,7%/51,3%) | 14  (78,6%/21,4%) | 35  (77,1%/22,9%) | 19  (94,7%/5,3%) | 86  (86,0%/14,0%) | 6  (66,7%/33,3%) |
| Total | 5223  (89,0%/11,0%) | 693  (69,4%/30,6%) | 252  (71,8%/28,2%) | 990  (88,8%/11,2%) | 465  (94,0%/6,0%) | 2687  (94,9%/5,1%) | 136  (88,2%/11,8%) |

**Figura 1.** Tendencias en el porcentaje de tumores en pacientes de género femenino a lo largo del periodo de estudio para los carcinomas de orofaringe.

**
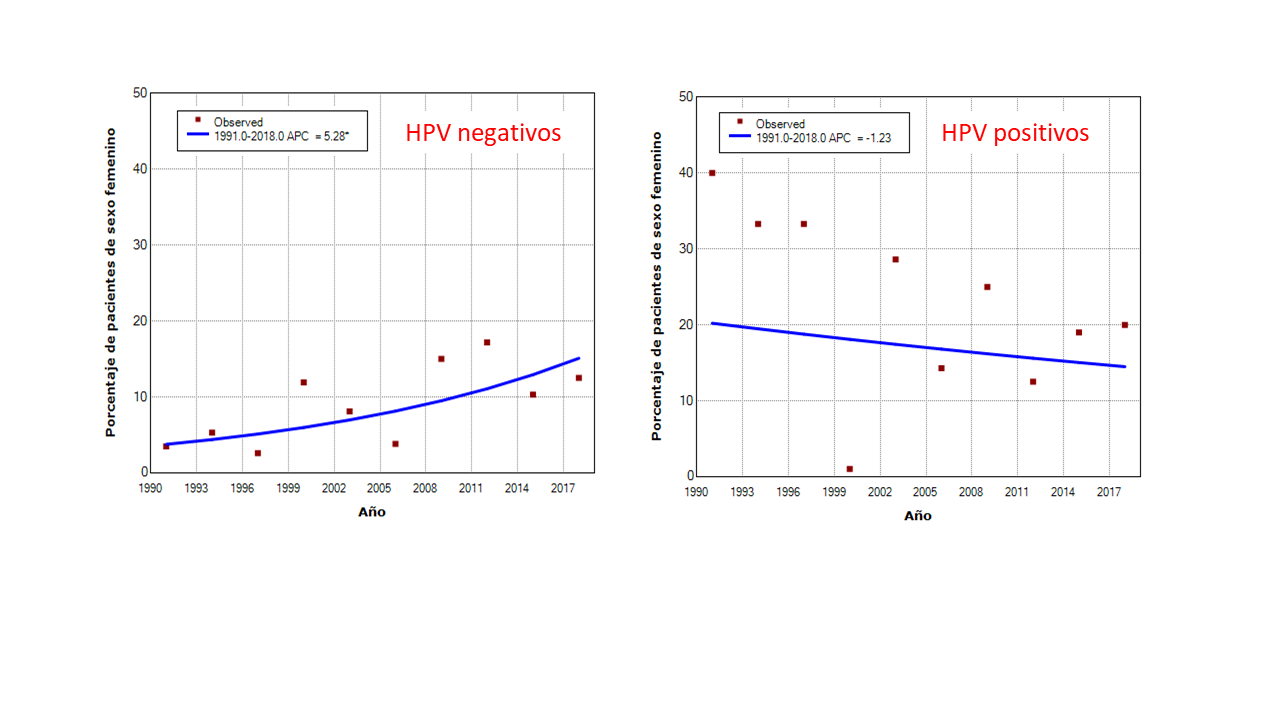
**

**Tabla 6.** Tipo de tratamiento realizado en función del género del paciente dependiendo de la localización del tumor primario (RT, radioterapia; QT-RT, quimio-radioterapia).

| **Cavidad oral** | | | |
| --- | --- | --- | --- |
| **Tratamiento** | **Género masculino** | **Género femenino** | **P** |
| Paliativo | 25 (4,6%) | 22 (10,4%) | 0,013 |
| Cirugía | 185 (34,4%) | 84 (39,8%) |
| Cirugía + RT/QT-RT | 128 (23,8%) | 41 (18,4%) |
| RT | 179 (33,3%) | 58 (27,5%) |
| QT-RT | 21 (3,9%) | 6 (2,8%) |
| Total | 538 (100%) | 211 (100%) |
| **Rinofaringe** | | | |
| **Tratamiento** | **Género masculino** | **Género femenino** | **P** |
| Paliativo | 4 (2,4%) | 4 (6,1%) | 0,006 |
| Cirugía | - | - |
| Cirugía + RT/QT-RT | - | - |
| RT | 118 (71,1%) | 33 (50,0%) |
| QT-RT | 44 (26,5%) | 29 (43,9%) |
| Total | 166 (100%) | 66 (100%) |
| **Orofaringe** | | | |
| **Tratamiento** | **Género masculino** | **Género femenino** | **P** |
| Paliativo | 129 (13,1%) | 8 (7,0%) | 0,044 |
| Cirugía | 110 (11,2%) | 9 (7,8%) |
| Cirugía + RT/QT-RT | 84 (8,5%) | 6 (5,2%) |
| RT | 445 (45,2%) | 56 (48,7%) |
| QT-RT | 216 (22,0%) | 36 (31,3%) |
| Total | 984 (100%) | 115 (100%) |
| **Hipofaringe** | | | |
| **Tratamiento** | **Género masculino** | **Género femenino** | **P** |
| Paliativo | 51 (10,7%) | 3 (10,3%) | 0,768 |
| Cirugía | 51 (10,7%) | 2 (6,9%) |
| Cirugía + RT/QT-RT | 109 (22,9%) | 6 (20,7%) |
| RT | 181 (38,1%) | 10 (34,5%) |
| QT-RT | 83 (17,5%) | 8 (27,6%) |
| Total | 475 (100%) | 29 (100%) |
| **Laringe** | | | |
| **Tratamiento** | **Género masculino** | **Género femenino** | **P** |
| Paliativo | 80 (3,2%) | 2 (1,6%) | 0,068 |
| Cirugía | 504 (20,4%) | 25 (19,5%) |
| Cirugía + RT/QT-RT | 424 (17,1%) | 13 (10,2%) |
| RT | 1349 (54,5%) | 77 (60,2%) |
| QT-RT | 119 (4,8%) | 11 (8,6%) |
| Total | 2476 (100%) | 128 (100%) |
| **Metástasis sin tumor primario** | | | |
| **Tratamiento** | **Género masculino** | **Género femenino** | **P** |
| Paliativo | 11 (9,8%) | 1 (7,7%) | 0,489 |
| Cirugía | 17 (15,2%) | 2 (15,4%) |
| Cirugía + RT/QT-RT | 73 (65,2%) | 7 (53,8%) |
| RT | 9 (8,0%) | 3 (23,1%) |
| QT-RT | 2 (1,8%) | 0 (0%) |
| Total | 112 (100%) | 13 (100%) |

**Tabla 7.** Supervivencia específica a los 5 años en función del género dependiendo de la localización del tumor primario (IC 95%).

|  | **Género masculino** | **Género femenino** | **P** |
| --- | --- | --- | --- |
| Cavidad oral | 65,8% (61,6-69,9%) | 52,9% (46,0-59,7%) | 0,0001 |
| Rinofaringe | 59,1% (51,4-66,7%) | 71,8% (60,6-82,9%) | 0,139 |
| Orofaringe | 46,9% (43,5-50,2%) | 63,7% (54,8-72,5%) | 0,003 |
| Hipofaringe | 46,4% (41,7-51,1%) | 51,3% (32,8-69,7%) | 0,617 |
| Laringe | 81,4% (79,8-82,9%) | 90,1% (84,1-95,3%) | 0,023 |
| Metástasis sin 1º | 38,5% (28,3-48,6%) | 73,8% (48,1-99,4%) | 0,136 |

**Figura 2.** Curvas de supervivencia específica de los pacientes con carcinomas de cavidad oral en función del género dependiendo de la categoría de extensión local del tumor (A) y del tipo de tratamiento realizado (B).

**
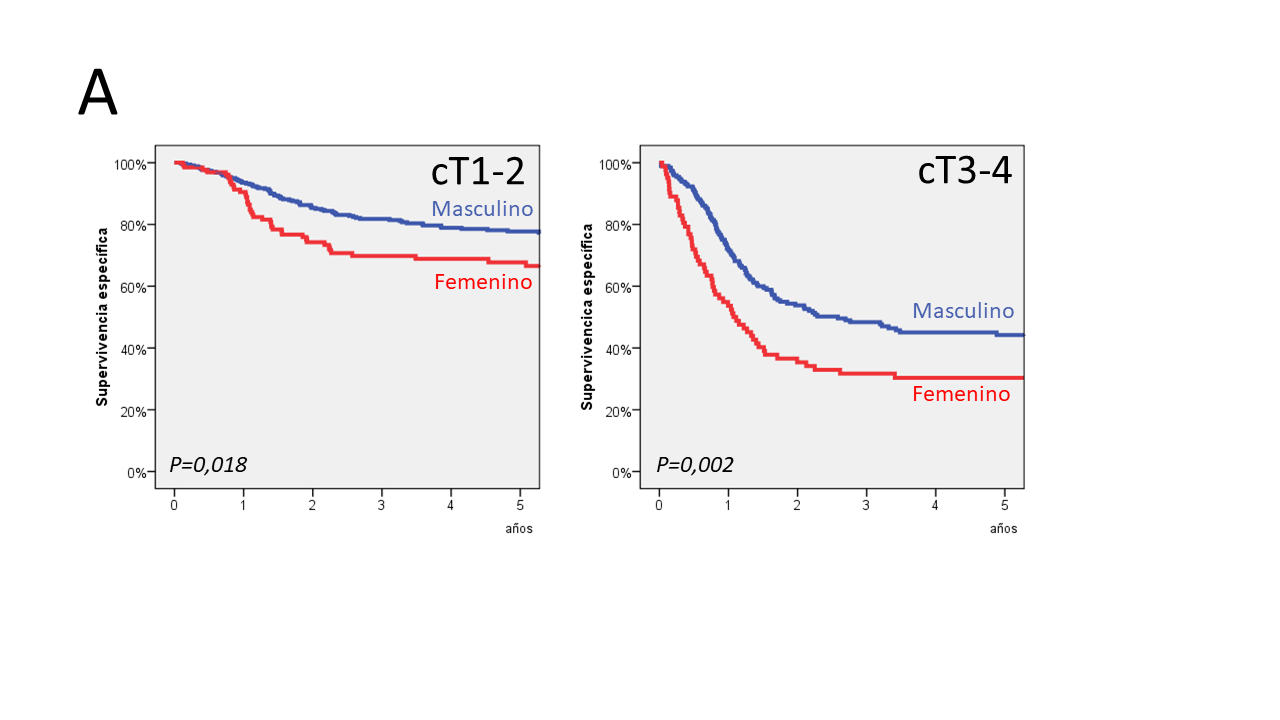
**

**
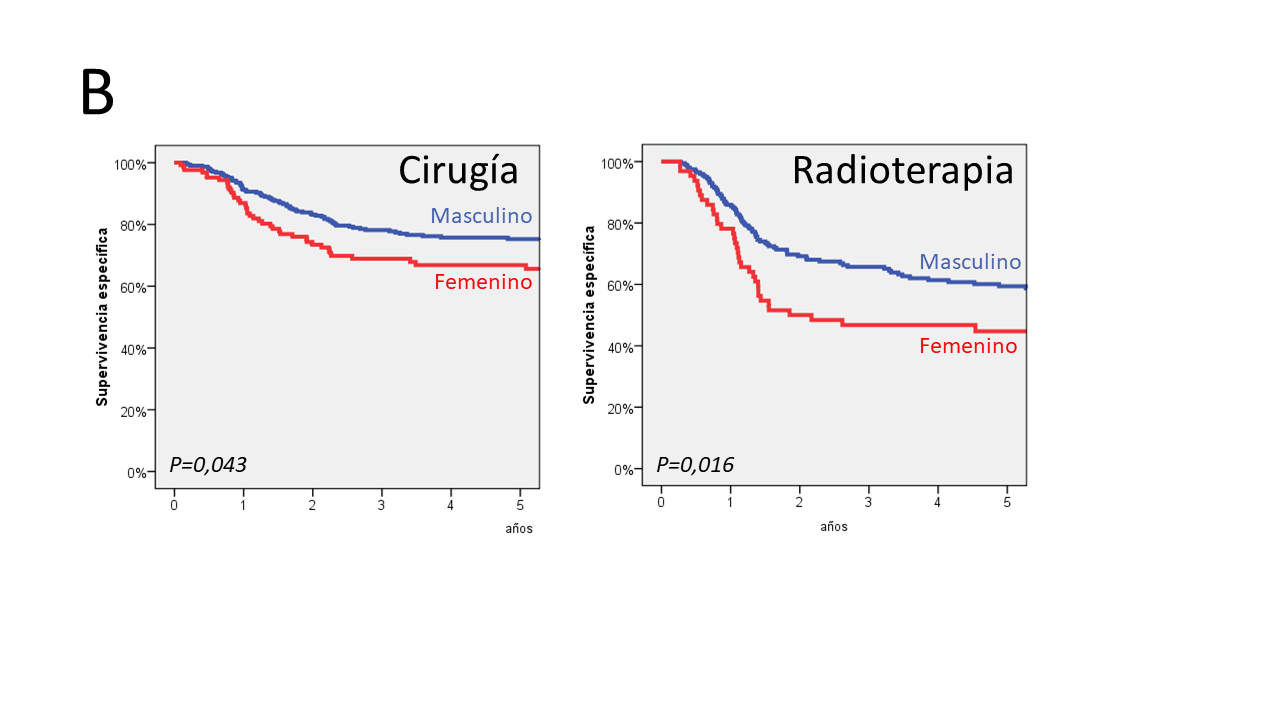
**

**Tabla 8.** Resultados del estudio multivariante considerando la supervivencia específica como variable dependiente para los tumores localizados en la cavidad oral.

|  | | **HR** | **IC 95%** | **P** |
| --- | --- | --- | --- | --- |
| **Edad** (años) | | 1,03 | 1,02-1,04 | 0,0001 |
| **Tóxicos** | No | 1 |  |  |
| Moderado | 0,94 | 0,62-1,42 | 0,783 |
| Severo | 0,90 | 0,62-1,31 | 0,603 |
| **cT** | cT1-2 | 1 |  |  |
| cT3-4 | 2,66 | 2,07-3,41 | 0,0001 |
| **cN** | cN0 | 1 |  |  |
| cN+ | 2,31 | 1,79-2,97 | 0,0001 |
| **Grado** | Bien diferenciado | 1 |  |  |
| Mod. diferenciado | 1,39 | 1,00-1,93 | 0,047 |
| Mal diferenciado | 2,15 | 1,24-3,71 | 0,006 |
| **Género** | Masculino | 1 |  |  |
| Femenino | 1,43 | 1,02-1,94 | 0,034 |
